# Supplementary material for: Cohesion, order and information flow in the collective motion of mixed-species shoals
Source: R Soc Open Sci. 2018 Dec 12;5(12):181132. doi: 10.1098/rsos.181132 (PMC6304150; doi:10.1098/rsos.181132)
Supplement: Data [file rsos181132supp5.csv]

Replicate	Treatment	Speed.Median	MNdist	TE
3	3SS	54.688	75.848	0.0581
8	3SS	63.344	78.48	0.0496
13	3SS	33.84	98.04	0.0362
18	3SS	92.072	153.2	0.043
23	3SS	96.944	89.864	0.0428
28	3SS	72.664	65.376	0.0477
1	9SS	44.44	57.776	0.0529
6	9SS	54.448	69.752	0.0583
11	9SS	25.736	90.288	0.0609
16	9SS	76.504	50.688	0.0632
21	9SS	44.776	55.536	0.0696
26	9SS	25.184	82.384	0.0523
2	Roach	47.384	162.976	0.0478
7	Roach	46.592	101.256	0.0476
12	Roach	38.68	82.264	0.0509
17	Roach	57.12	140.64	0.0411
22	Roach	53.68	149.976	0.0369
27	Roach	46.24	145.952	0.0539
4	Mix39	46.352	61.552	0.0678
9	Mix39	22.816	89.984	0.0277
14	Mix39	27.496	55.72	0.0562
19	Mix39	34.744	87.04	0.0513
24	Mix39	54.528	99.36	0.0482
29	Mix39	51.384	76.4	0.054
5	Mix3R	45.424	295.136	0.0376
10	Mix3R	51.888	182.656	0.0443
15	Mix3R	61.008	103.12	0.0432
20	Mix3R	66.408	110.44	0.0477
25	Mix3R	38.344	260.328	0.0435
30	Mix3R	35.896	256.84	0.0458
